# Supplementary material
Source: publisher figshare collection journal article supplement (https://asha.figshare.com/articles/dataset/_/6626222)
Supplement: Supplementary file 2 [file 1]

### **Supplemental Material S1.** Script for kinematic data collection protocol.

The kinematic data collection protocol was reviewed using the following script. Minor variations in wording, indicated in the parentheses below, were based on participant age; adult wording is shown on the left and child/adolescent wording is shown on the right.

“Before I put the (marker/sticker) on your tongue, let’s go over what you will do once more. Remember, you will move your tongue from side to side outside your mouth. I’m going to count, and after you have done it 5 times, I’ll tell you to ‘Bite and hold’ [*model*] so you can rest while your tongue stays outside your mouth. Make sure your tongue stays outside your mouth. Then I will say ‘Open,’ so you will open your mouth again, keeping your tongue outside your mouth. When I say ‘Continue,’ you will move your tongue from side to side again. We’ll do the whole thing 4 times. Watch while I show you...”
